# Supplementary material for: Sulfate-ion-assisted galvanic replacement tuning of silver dendrites to highly branched chains for effective SERS
Source: Royal Society of Chemistry journal article supplement (doi:10.1039/c4cp02525c), 2014-01-01
Supplement: c4cp02525c1.pdf [file c4cp02525c1.pdf]

## **Supporting Information**

### **Sulfate-Ion-Assisted Galvanic Replacement Tuning of Silver Dendrites to Highly Branched Chains for Effective SERS**

Yunxia Zhang, Shaodong Sun, Xiaozhe Zhang, Linli Tang, Xiaoping Song and Zhimao Yang\*

School of Science, State Key Laboratory for Mechanical Behavior of Materials, MOE Key  
Laboratory for Non-Equilibrium Synthesis and Modulation of Condensed Matter, Collaborative  
Innovation Center of Suzhou Nano Science and Technology, Xi'an Jiaotong University, Xi'an,  
710049, ShaanXi, People's Republic of China

Corresponding Author: Zhimao Yang\*

Address: School of Science, Xi'an Jiaotong University, No. 28, Xianning West Road, Xi'an,  
Shaanxi, 710049, People's Republic of China;

E-mail: [zmyang@mail.xjtu.edu.cn](mailto:zmyang@mail.xjtu.edu.cn);

Tel/Fax: +86 2982665995.

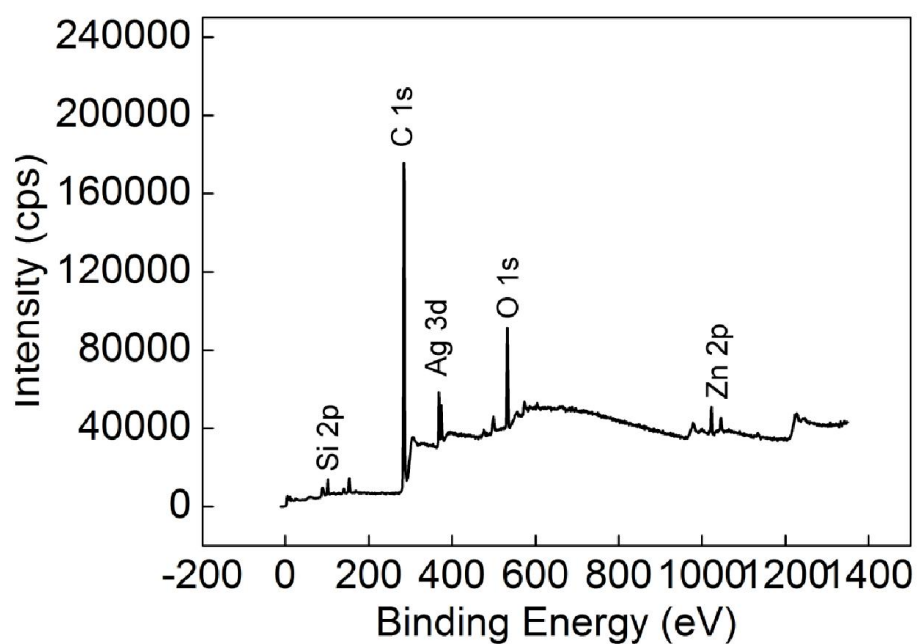

**Fig. S1** XPS wide spectrum of the HBSCs (highly branched silver chains) obtained in 10 mM  $\text{AgNO}_3$  aqueous solution in the presence of 2.5 mM  $\text{Na}_2\text{SO}_4$  at a reaction time of 10 min.

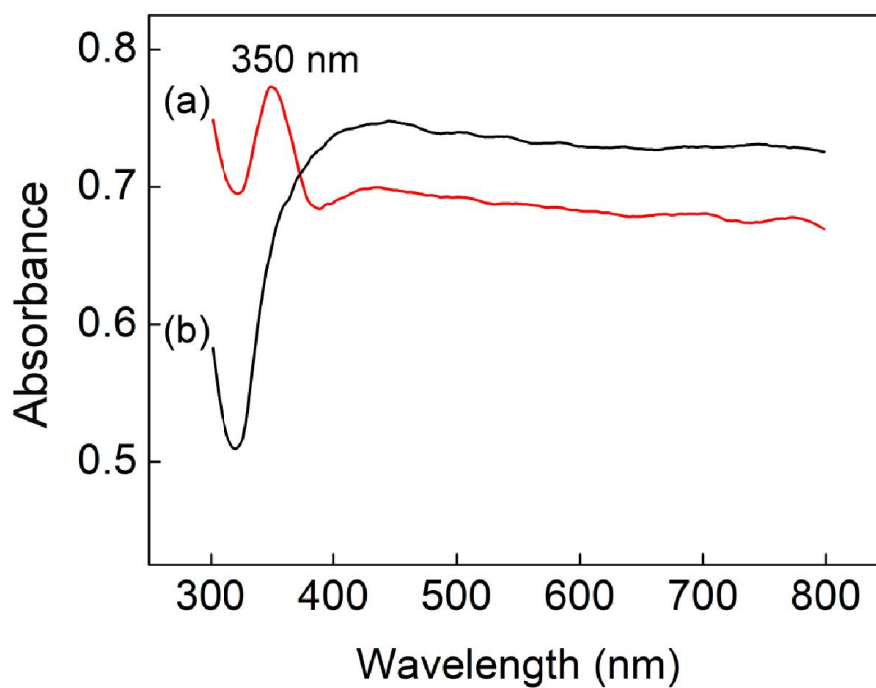

**Fig. S2** UV-vis spectra of silver dendrites (a) and HBSCs (b).

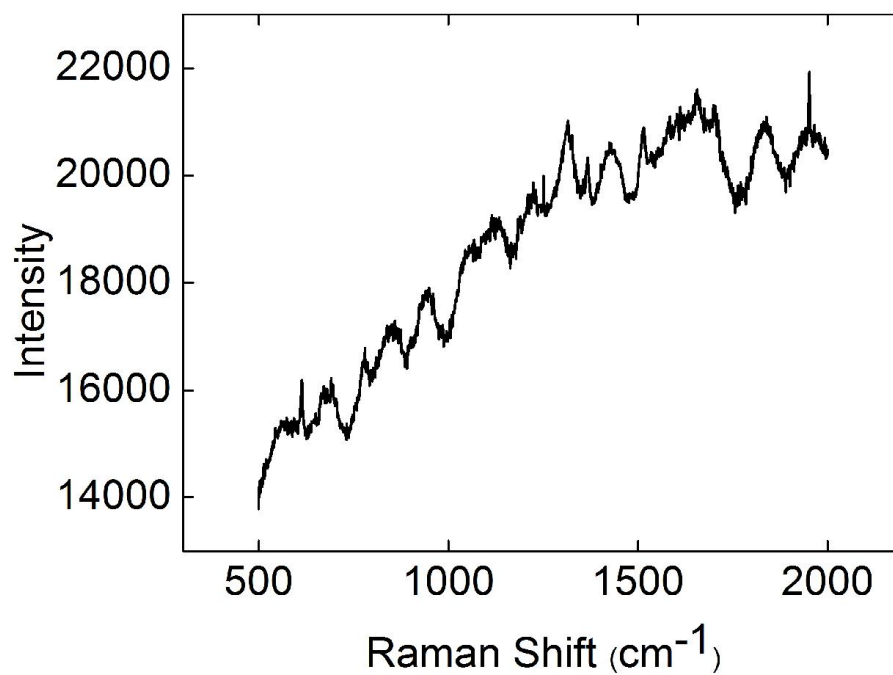

**Fig.S3** Raman spectrum of R6G ( $1 \times 10^{-2}$  M in ethanol solution). (Excitation: 633 nm, power: 17 mW, data collection: 120 s and  $10 \times$  microscope objective lens)
